# Supplementary material for: Effects of the reaction temperature and Ba/Ti precursor ratio on the crystallite size of BaTiO3 in hydrothermal synthesis
Source: Royal Society of Chemistry journal article supplement (doi:10.1039/d2ra03707f), 2022-01-01
Supplement: d2ra03707f1.pdf [file d2ra03707f1.pdf]

## Supplementary Information

### Effects of the reaction temperature and Ba/Ti precursor ratio on the crystallite size of BaTiO<sub>3</sub> in hydrothermal synthesis

Min Zhang,<sup>a</sup> Joseph Falvey,<sup>a</sup> Andrew L. Hector <sup>\*a</sup> and Nuria Garcia-Araez <sup>a,b</sup>

<sup>a</sup> School of Chemistry, University of Southampton, Highfield, Southampton SO17 1BJ, UK

E-mail: A.L.Hector@soton.ac.uk

<sup>b</sup> The Faraday Institution, Quad One, Harwell Campus, Didcot OX11 0RA, UK

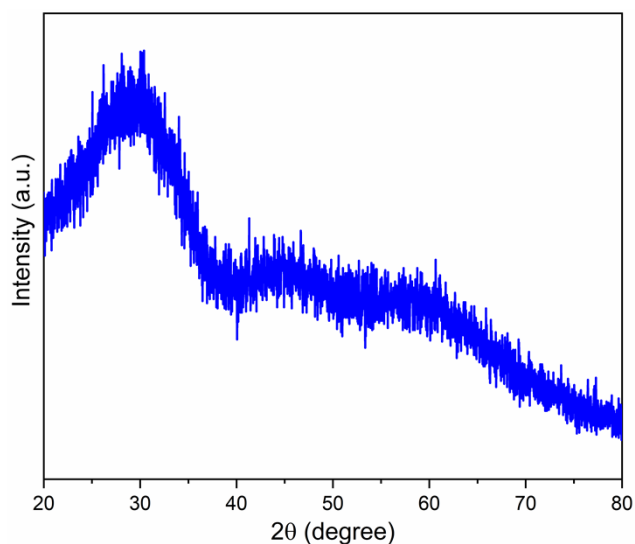

**Fig. S1** XRD pattern of amorphous TiO<sub>2</sub> powder precipitated when using Ti(OCH(CH<sub>3</sub>)<sub>2</sub>)<sub>4</sub> as the Ti precursor in hydrothermal synthesis of BaTiO<sub>3</sub>.

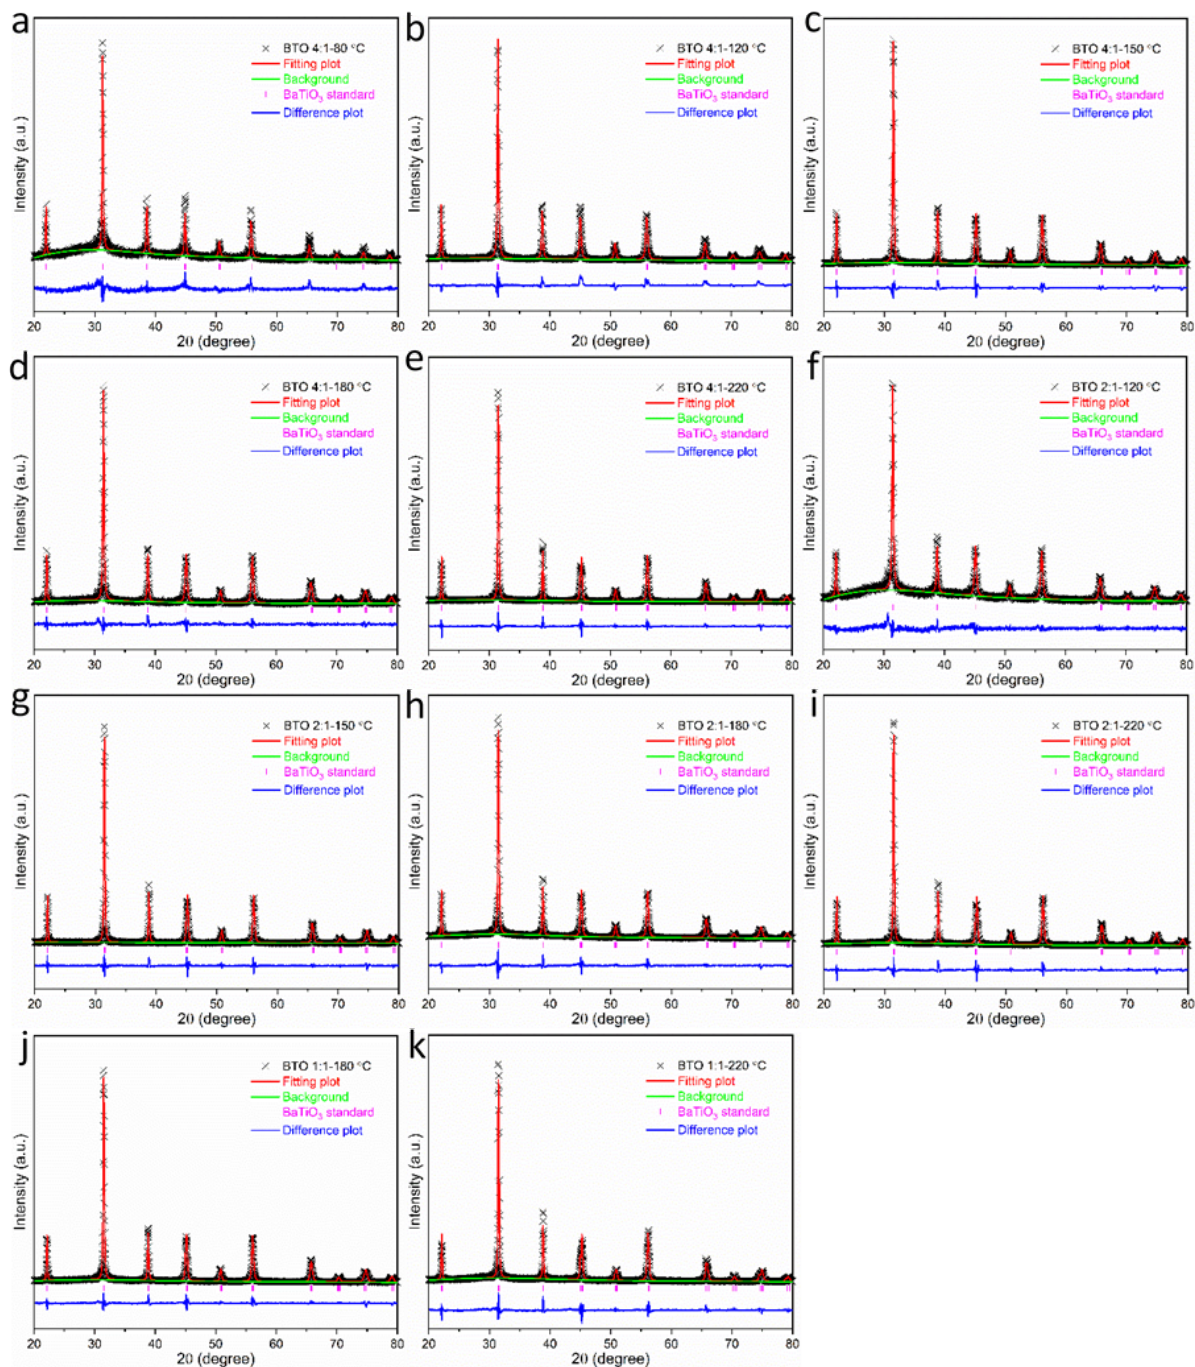

**Fig. S2** Rietveld fits to the XRD patterns of (a) BTO 4:1-80 °C, (b) BTO 4:1-120 °C, (c) BTO 4:1-150 °C, (d) BTO 4:1-180 °C, (e) BTO 4:1-220 °C, (f) BTO 2:1-120 °C, (g) BTO 2:1-150 °C, (h) BTO 2:1-180 °C, (i) BTO 2:1-220 °C, (j) BTO 1:1-180 °C and (k) BTO 1:1-220 °C samples (sample labels explained in Table 1). The data points and Rietveld fits are overlaid as black crosses and red lines, respectively. The difference plots and background are shown in blue and green, respectively. The pink tick marks represent the allowed reflection positions for tetragonal  $\text{BaTiO}_3$  structure with space group  $P4mm$ .

**Table S1** Lattice parameters ( $a$ ,  $c$ ), tetragonality ( $c/a$ ), Lorentzian values ( $L_x$ ,  $L_y$ ) and reliability factors ( $R_{wp}$ ,  $R_p$ ) obtained from the Rietveld fits to the XRD patterns of BaTiO<sub>3</sub> samples (sample labels explained in Table 1).

| Sample         | Lattice parameter |           | Tetragonality | Lorentzian value |       | Reliability factor |        |
|----------------|-------------------|-----------|---------------|------------------|-------|--------------------|--------|
|                | $a$ [Å]           | $c$ [Å]   | $c/a$         | $L_x$            | $L_y$ | $R_{wp}$           | $R_p$  |
| BTO 4:1-80 °C  | 4.0308(4)         | 4.0304(9) | 0.9999        | 6.15(24)         | 33.09 | 0.1478             | 0.1197 |
| BTO 4:1-120 °C | 4.0153(2)         | 4.0285(3) | 1.0033        | 3.89(15)         | 48.78 | 0.0975             | 0.0778 |
| BTO 4:1-150 °C | 4.0105(2)         | 4.0276(2) | 1.0043        | 3.60(10)         | 38.68 | 0.1044             | 0.0807 |
| BTO 4:1-180 °C | 4.0100(3)         | 4.0251(4) | 1.0038        | 3.42(17)         | 47.88 | 0.1312             | 0.0973 |
| BTO 4:1-220 °C | 4.0044(1)         | 4.0244(2) | 1.0050        | 2.22(9)          | 34.76 | 0.1102             | 0.0836 |
| BTO 2:1-120 °C | 4.0101(4)         | 4.0242(6) | 1.0035        | 7.37(26)         | 44.37 | 0.1157             | 0.0883 |
| BTO 2:1-150 °C | 4.0073(2)         | 4.0236(2) | 1.0041        | 3.20(11)         | 32.98 | 0.1385             | 0.1061 |
| BTO 2:1-180 °C | 4.0070(2)         | 4.0233(2) | 1.0041        | 3.13(12)         | 38.40 | 0.1074             | 0.0849 |
| BTO 2:1-220 °C | 4.0049(1)         | 4.0232(2) | 1.0046        | 2.26(9)          | 36.00 | 0.1048             | 0.0811 |
| BTO 1:1-180 °C | 4.0085(1)         | 4.0241(2) | 1.0039        | 2.36(10)         | 38.95 | 0.1004             | 0.0778 |
| BTO 1:1-220 °C | 4.0007(2)         | 4.0255(2) | 1.0062        | 2.12(10)         | 32.83 | 0.1097             | 0.0871 |

Note that  $L_x$  is Lorentzian broadening associated with the crystallite size, and  $L_y$  is Lorentzian broadening associated with the microstrain.

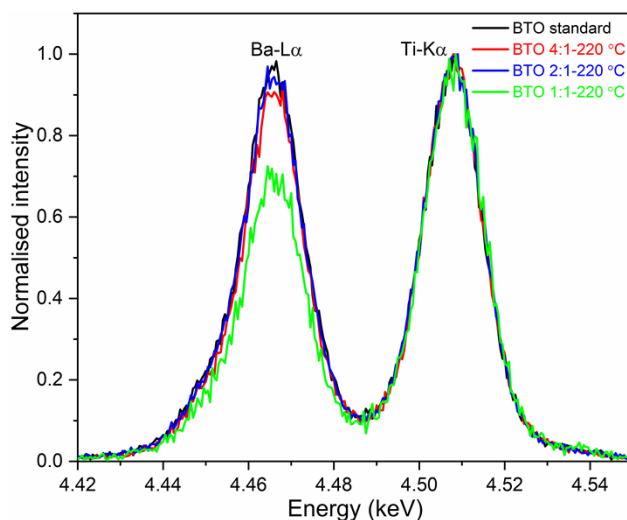

**Fig. S3** WDS spectra of the standard BaTiO<sub>3</sub> and BaTiO<sub>3</sub> samples hydrothermally synthesised at 220 °C using Ba/Ti precursor ratios of 4:1, 2:1 and 1:1 (sample labels explained in Table 1).

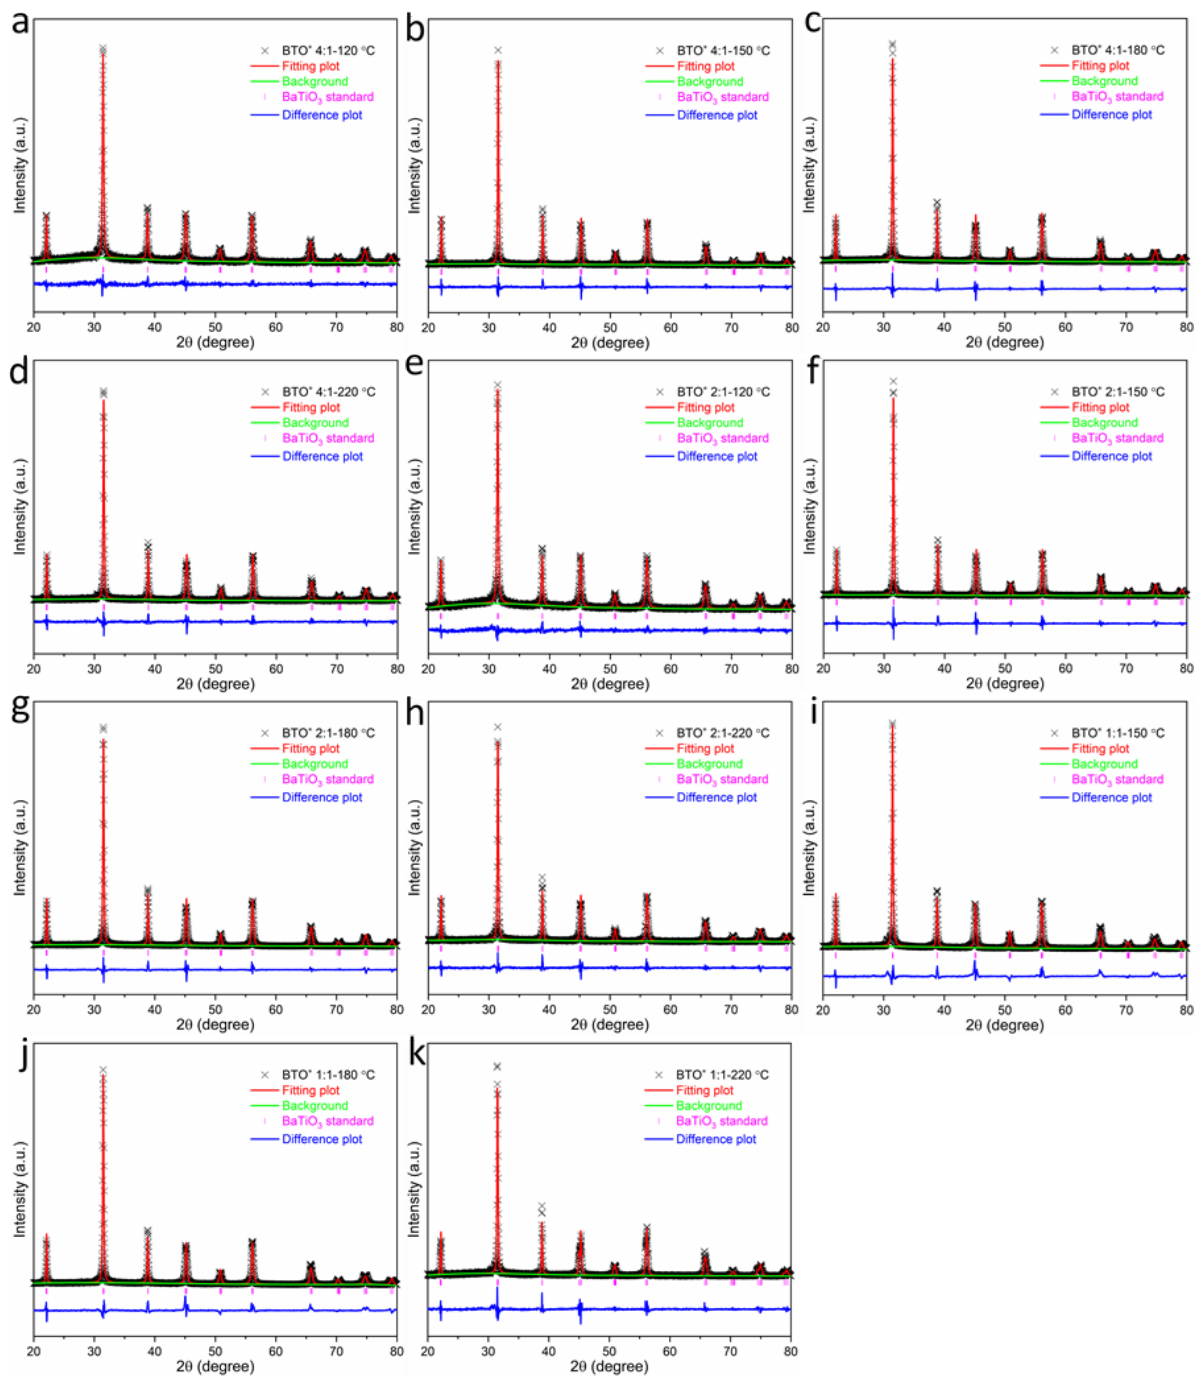

**Fig. S4** Rietveld fits to the XRD patterns of (a) BTO\* 4:1-120 °C, (b) BTO\* 4:1-150 °C, (c) BTO\* 4:1-180 °C, (d) BTO\* 4:1-220 °C, (e) BTO\* 2:1-120 °C, (f) BTO\* 2:1-150 °C, (g) BTO\* 2:1-180 °C, (h) BTO\* 2:1-220 °C, (i) BTO\* 1:1-150 °C, (j) BTO\* 1:1-180 °C and (k) BTO\* 1:1-220 °C samples (sample labels explained in Table 4). The data points and Rietveld fits are overlaid as black crosses and red lines, respectively. The difference plots and background are shown in blue and green, respectively. The pink tick marks represent the allowed reflection positions for tetragonal BaTiO<sub>3</sub> structure with space group  $P4mm$ .

**Table S2** Lattice parameters ( $a$ ,  $c$ ), tetragonality ( $c/a$ ), Lorentzian values ( $L_x$ ,  $L_y$ ) and reliability factors ( $R_{wp}$ ,  $R_p$ ) obtained from the Rietveld fits to the XRD patterns of BaTiO<sub>3</sub> samples (sample labels explained in Table 4).

| Sample          | Lattice parameter |           | Tetragonality | Lorentzian value |       | Reliability factor |        |
|-----------------|-------------------|-----------|---------------|------------------|-------|--------------------|--------|
|                 | $a$ [Å]           | $c$ [Å]   | $c/a$         | $L_x$            | $L_y$ | $R_{wp}$           | $R_p$  |
| BTO* 4:1-120 °C | 4.0104(3)         | 4.0251(4) | 1.0037        | 5.05(20)         | 47.74 | 0.1176             | 0.0893 |
| BTO* 4:1-150 °C | 4.0083(2)         | 4.0231(2) | 1.0037        | 2.45(11)         | 31.37 | 0.1396             | 0.1060 |
| BTO* 4:1-180 °C | 4.0045(1)         | 4.0230(2) | 1.0046        | 2.33(9)          | 31.38 | 0.1110             | 0.0867 |
| BTO* 4:1-220 °C | 4.0065(2)         | 4.0241(3) | 1.0044        | 2.00(12)         | 36.14 | 0.1444             | 0.1097 |
| BTO* 2:1-120 °C | 4.0089(3)         | 4.0239(4) | 1.0037        | 7.02(19)         | 40.18 | 0.1182             | 0.0893 |
| BTO* 2:1-150 °C | 4.0076(2)         | 4.0242(2) | 1.0041        | 2.60(10)         | 30.27 | 0.1460             | 0.1118 |
| BTO* 2:1-180 °C | 4.0057(1)         | 4.0237(2) | 1.0045        | 2.53(9)          | 33.36 | 0.1093             | 0.0850 |
| BTO* 2:1-220 °C | 4.0047(2)         | 4.0225(2) | 1.0044        | 2.04(12)         | 34.59 | 0.1418             | 0.1060 |
| BTO* 1:1-150 °C | 4.0110(3)         | 4.0221(4) | 1.0028        | 2.07(15)         | 44.63 | 0.1596             | 0.1221 |
| BTO* 1:1-180 °C | 4.0075(2)         | 4.0223(3) | 1.0037        | 1.77(14)         | 43.44 | 0.1455             | 0.1109 |
| BTO* 1:1-220 °C | 4.0010(2)         | 4.0266(2) | 1.0064        | 1.63(12)         | 30.66 | 0.1509             | 0.1195 |

Note that  $L_x$  is Lorentzian broadening associated with the crystallite size, and  $L_y$  is Lorentzian broadening associated with the microstrain.

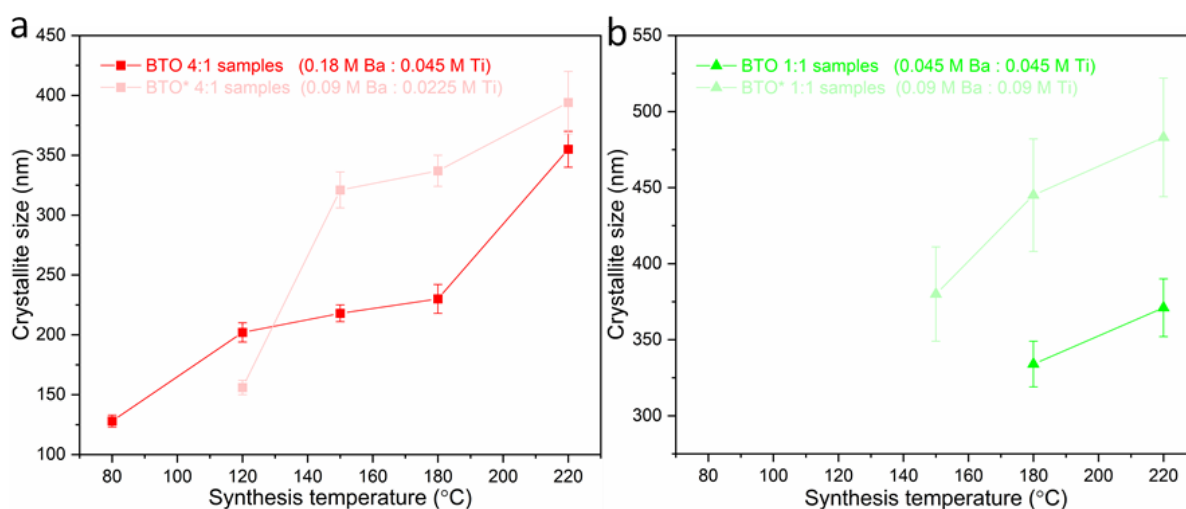

**Fig. S5** Crystallite size of BaTiO<sub>3</sub> samples plotted against reaction temperature in hydrothermal synthesis using Ba/Ti precursor ratios of (a) 4:1 and (b) 1:1, obtained from the Rietveld fits to the XRD patterns, for the reaction conditions of (a) 0.18 M Ba : 0.045 M Ti and 0.09 M Ba : 0.0225 M Ti, (b) 0.045 M Ba : 0.045 M Ti and 0.09 M Ba : 0.09 M Ti. Sample labels explained in Table 1 and Table 4.
